# Supplementary material for: Spatio-temporal changes in cryoconite community, isotopic, and elemental composition over the ablation season of an alpine glacier
Source: Copernicus journal article supplement (doi:10.5194/bg-2022-198), 2022-10-11
Supplement: Supplementary file 1 [file bg-2022-198-supplement.zip]

Archive with 2 entries (2 files):
- Figure S1.pdf
- Table S1.pdf
