# Supplementary material for: Spatio-temporal changes in cryoconite community, isotopic, and elemental composition over the ablation season of an alpine glacier
Source: Copernicus journal article supplement (doi:10.5194/bg-2022-198), 2022-10-11

1 Figure S1. Elemental composition of cryoconite in lower and upper part of ablation zone on Forni Glacier in 2019.

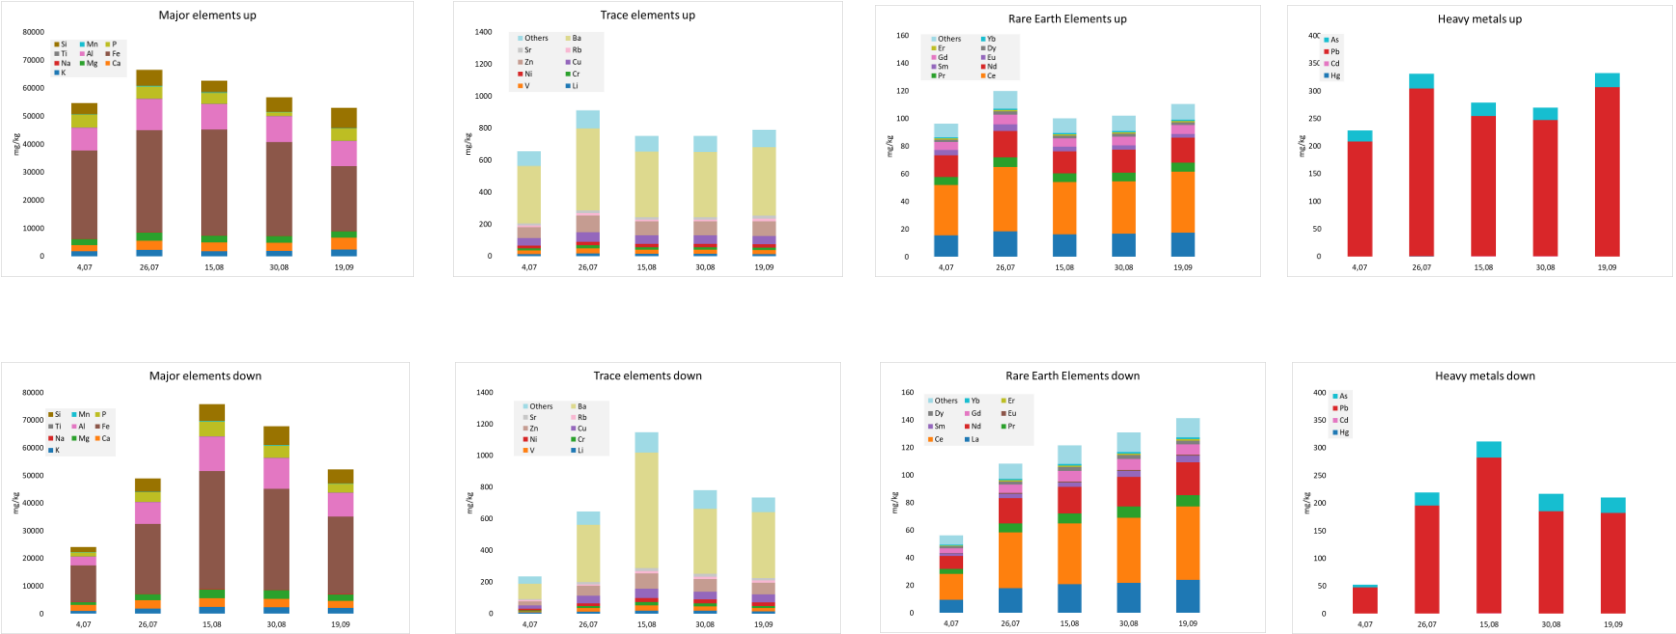

Supplement: Supplementary file 1 [file bg-2022-198-supplement.zip › Figure S1.pdf]
