# Supplementary material for: Spatio-temporal changes in cryoconite community, isotopic, and elemental composition over the ablation season of an alpine glacier
Source: Copernicus journal article supplement (doi:10.5194/bg-2022-198), 2022-10-11
Supplement: Supplementary file 1 [file bg-2022-198-supplement.zip › Table S1.pdf]

Table S1. Species composition and biomass of specific algae taxa in lower and upper part of ablation zone on Forni Glacier in 2019.

| Species mm3/L                      | Date of sampling  |                |                 |                |                |                |                |                |                |                |   |
|------------------------------------|-------------------|----------------|-----------------|----------------|----------------|----------------|----------------|----------------|----------------|----------------|---|
|                                    | 4.7Down           | 4.7Up          | 26.7Down        | 26.7Up         | 15.8Dowr       | 15.8Up         | 30.8Dowr       | 30.8Up         | 19.9Dowr       | 19.9Up         |   |
| <b>Cyanobacteria</b>               |                   |                |                 |                |                |                |                |                |                |                |   |
| cf. <i>Chroococcus</i> sp.         | 0                 | 0              | 0               | 26,5           | 0              | 0              | 0              | 0              | 0              | 0              | 0 |
| <i>Phormidium</i> sp.              | 3331,26902        | 81173          | 67982,56        | 1144,1         | 17441,5        | 560,82         | 2770,45        | 0              | 171869         | 2658,29        |   |
| <i>Leptolyngbya</i> sp. 1          | 1047,78466        | 2014,97        | 224,275         | 455,6          | 560,687        | 38,5           | 0              | 0              | 304,874        | 772,697        |   |
| <i>Leptolyngbya</i> sp. 2          | 190,1             | 0              | 0               | 0              | 0              | 0              | 0              | 0              | 0              | 0              |   |
| <i>Pseudanabaena</i> sp.           | 0                 | 0              | 0               | 0              | 0              | 44,1563        | 0              | 0              | 0              | 0              |   |
| Total                              | <b>4569,15368</b> | <b>83188</b>   | <b>68206,84</b> | <b>1626,2</b>  | <b>18002,2</b> | <b>643,476</b> | <b>2770,45</b> | <b>0</b>       | <b>172174</b>  | <b>3430,98</b> |   |
| <b>Chlorophyta</b>                 |                   |                |                 |                |                |                |                |                |                |                |   |
| <i>Cylindrocystis brebbisoni</i> ( | 43535,8278        | 361396         | 148021,8        | 4011,2         | 37470,2        | 4343,8         | 3913,33        | 75918,7        | 54884,5        | 4725,35        |   |
| <i>Chlorella</i> sp.               | 42544,5454        | 0              | 11613,21        | 17978,1        | 20970,8        | 15633,2        | 0              | 10049,9        | 2512,47        | 17754,8        |   |
| <i>Mesotaenium</i> sp.             | 0                 | 0              | 0               | 0              | 0              | 491,333        | 0              | 0              | 0              | 736,999        |   |
| <i>Trochiscia granulata</i> (Rein  | 2638,65596        | 0              | 0               | 0              | 1754,71        | 0              | 0              | 0              | 0              | 5277,31        |   |
| <i>Trochiscia</i> sp.              | 334,264658        | 668,529        | 0               | 0              | 0              | 668,529        | 0              | 1337,06        | 0              | 0              |   |
| coccoid green algae                | 0                 | 1391,64        | 463,8805        | 2254,5         | 774,68         | 0              | 0              | 0              | 0              | 0              |   |
| Total                              | <b>89053,2939</b> | <b>363456</b>  | <b>160098,9</b> | <b>24243,8</b> | <b>60970,3</b> | <b>21136,8</b> | <b>3913,33</b> | <b>87305,6</b> | <b>57397</b>   | <b>28494,5</b> |   |
| <b>Bacillariophyceae</b>           |                   |                |                 |                |                |                |                |                |                |                |   |
| <i>Fragilaria</i> sp.              | 0                 | 0              | 0               | 0              | 177            | 177            | 0              | 0              | 0              | 0              |   |
| <i>Nitzschia</i> sp. 1             | 300               | 900            | 540             | 1050           | 0              | 0              | 240,1          | 300            | 300            | 0              |   |
| <i>Nitzschia</i> sp. 2             | 0                 | 0              | 0               | 400            | 300            | 600            | 0              | 0              | 0              | 0              |   |
| <i>Nitzschia</i> sp. 3             | 0                 | 0              | 0               | 100            | 0              | 0              | 0              | 0              | 0              | 0              |   |
| <i>Cyclotella</i> sp.              | 2200              | 5500           | 4400            | 0              | 0              | 0              | 0              | 0              | 0              | 0              |   |
| <i>Pinnularia</i> sp. 2            | 0                 | 0              | 0               | 800            | 0              | 0              | 0              | 0              | 0              | 0              |   |
| <i>Pinnularia</i> sp. 1            | 0                 | 0              | 440             | 0              | 0              | 0              | 0              | 880            | 0              | 440            |   |
| <i>Eunotia</i> sp.                 | 0                 | 0              | 1059,19         | 0              | 0              | 0              | 0              | 0              | 0              | 0              |   |
| cf. <i>Achnanthes</i> sp.          | 0                 | 0              | 0               | 0              | 0              | 1000           | 0              | 0              | 0              | 500            |   |
| <i>Diatoma</i> sp.                 | 0                 | 0              | 0               | 500            | 0              | 500            | 0              | 0              | 0              | 0              |   |
| <i>Suriella</i> sp.                | 0                 | 0              | 0               | 800            | 0              | 0              | 0              | 0              | 0              | 0              |   |
| <i>Aulacoseira granulata</i> (Eh   | 0                 | 623,113        | 934,6692        | 934,7          | 623,113        | 383,214        | 0              | 0              | 623,113        | 520,299        |   |
| Unidentified 1                     | 0                 | 0              | 0               | 0              | 0              | 966,6          | 0              | 0              | 0              | 0              |   |
| Unidentified 2                     | 0                 | 406,64         | 0               | 0              | 0              | 0              | 0              | 0              | 0              | 0              |   |
| Total                              | <b>2500</b>       | <b>7429,75</b> | <b>7373,859</b> | <b>4584,7</b>  | <b>1100,11</b> | <b>3626,81</b> | <b>240,1</b>   | <b>1180</b>    | <b>923,113</b> | <b>1460,3</b>  |   |
